# Supplementary material for: People-Oriented: A Framework for Evaluating the Level of Green Space Provision in the Life Circle from a Supply and Demand Perspective: A Case Study of Gulou District, Nanjing, China
Source: MDPI journal article supplement (doi:10.3390/su16030955), 2024-01-23
Supplement: s1 [file s1]

Archive with 1 entries (1 files):
- sustainability-2771158-supplementary.pdf
